# Supplementary material for: Data Integration for Microarrays: Enhanced Inference for Gene Regulatory Networks
Source: Microarrays (Basel). 2015 May 14;4(2):255–69. doi: 10.3390/microarrays4020255 (PMC4996389; doi:10.3390/microarrays4020255)
Supplement: Supplementary File 1 [file microarrays-04-00255-s001.csv]

eve	en
ftz	en
hb	en
Kr	en
bcd	eve
gt	eve
hb	eve
Kr	eve
cad	ftz
en	ftz
bcd	hb
Kr	hb
bcd	Kr
gt	Kr
hb	Kr
twi	sna
